# Supplementary material for: Trends in the Utilization of Teleneurology and Other Healthcare Resources Prior to and During the COVID-19 Pandemic in an Urban, Tertiary Health System
Source: PubMed Central journal article supplement (PMC8873082; doi:10.3389/fneur.2022.834708), 2022-02-11
Supplement: Table_1.pdf [file Table_1.pdf]

## **Supplemental Material**

### **Factors Associated with Utilization of Teleneurology and Other Healthcare Resources During the COVID-19 Pandemic**

Benjamin R Kummer MD, Parul Agarwal PhD, Chloe Sweetnam MSc, Jessica Robinson-Papp MD PhD, Leah J Blank MD MPH, Ilana Katz Sand MD, Georges Naasan MD, Christina Palmese PhD, Joohee Jimenez-Shahed MD, Jihan Grant MD, Alison Navis MD, Laura Stein MD MPH, Shanna Patterson MD, Nathalie Jetté MD MSc

---

**Supplemental Table 1. Diagnostic Code Groupings**

---

| <b>ICD-10-CM Code Group</b>               | <b>Description</b>                                                                     |
|-------------------------------------------|----------------------------------------------------------------------------------------|
| C00.x-D49.x<br>D50.x-D75.x<br>D80.x-D89.x | Neoplasms                                                                              |
| E01.x-E89.x                               | Endocrine, nutritional and metabolic diseases                                          |
| F01.x-F05.x<br>G30.x-G32.x                | Dementia and delirium                                                                  |
| F06.x-F69.x,<br>F99.x                     | Mental (excluding neurodevelopmental) disorders                                        |
| F79.x-F98.x                               | Neurodevelopmental, behavioral and emotional disorders with childhood/adolescent onset |
| G10.x-G14.x                               | Systemic atrophies of the central nervous system                                       |
| G20.x-G26.x                               | Extrapyramidal and movement disorders                                                  |
| G35.x-37.x                                | Demyelinating nervous system disorders                                                 |
| G40.x<br>R56.x                            | Epilepsy                                                                               |
| G43.x-G44.x<br>R51.x                      | Migraine and headache disorders                                                        |
| G45.x-46.x<br>I60.x-I69.x                 | Cerebrovascular disorders                                                              |
| G47.x<br>G80.x-83.x<br>G89.x-G99.x        | Sleep and other neurological disorders                                                 |
| G50.x-G59.x                               | Neuromuscular disorders                                                                |
| H00.x-H57.x<br>H60.x-H93.x                | Eye, ear, and adnexal disorders                                                        |
| I02.x-I51.x<br>I70.x-I99.x                | Circulatory (excluding cerebrovascular) disorders                                      |
| A00.x-B99.x<br>G00.x-G09.x                | Infectious disorders                                                                   |
| J00.x-J96.x<br>K02.x-K94.x<br>L02.x-L98.x | Respiratory, digestive, and skin disorders                                             |
| M05.x-M99.x                               | Musculoskeletal and connective tissue disorders                                        |
| R00.x-R99.x                               | Abnormal clinical and laboratory findings, not elsewhere classified                    |
| R25.x-R29.x                               | Symptoms and signs involving the nervous and musculoskeletal systems                   |
| R40.x-R46.x                               | Symptoms and signs involving cognition, perception, emotional state and behavior       |

Abbreviations: ICD-10-CM, International Classification of Diseases, 10<sup>th</sup> Edition, Clinical Modification.

---

**Supplemental Table 2. Pre-COVID Visit Diagnoses, Stratified by TN Utilization during the COVID Period**

| <b>Visit Diagnosis</b>                                                                 | <b>Used TN<br/>(N= 4,944)</b> | <b>Did not use TN<br/>(N = 9,226)</b> | <b>p-value</b> |
|----------------------------------------------------------------------------------------|-------------------------------|---------------------------------------|----------------|
| Neoplasms                                                                              | 78 (1.6)                      | 190 (2.1)                             | 0.04481        |
| Endocrine, nutritional and metabolic diseases                                          | 85 (1.7)                      | 260 (2.8)                             | <0.0001        |
| Dementia and delirium                                                                  | 170 (3.4)                     | 392 (4.2)                             | 0.01848        |
| Mental (excluding neurodevelopmental) disorders                                        | 268 (5.4)                     | 331 (3.6)                             | <0.0001        |
| Neurodevelopmental, behavioral and emotional disorders with childhood/adolescent onset | 160 (3.2)                     | 265 (2.9)                             | 0.22607        |
| Systemic atrophies of the central nervous system                                       | 41 (0.8)                      | 79 (0.9)                              | 0.86729        |
| Extrapyramidal and movement disorders                                                  | 977 (19.8)                    | 1,348 (14.6)                          | <0.0001        |
| Demyelinating nervous system disorders                                                 | 1,176 (23.8)                  | 584 (6.3)                             | <0.0001        |
| Epilepsy                                                                               | 579 (11.7)                    | 1,357 (14.7)                          | <0.0001        |
| Migraine and headache disorders                                                        | 1,088 (22.0)                  | 1,570 (17.0)                          | <0.0001        |
| Cerebrovascular disorders                                                              | 211 (4.3)                     | 835 (9.0)                             | <0.0001        |
| Sleep and other neurological disorders                                                 | 180 (3.6)                     | 515 (5.6)                             | <0.0001        |
| Neuromuscular disorders                                                                | 339 (6.9)                     | 1,169 (12.7)                          | <0.0001        |
| Eye, ear, and adnexal disorders                                                        | 84 (1.7)                      | 322 (3.5)                             | <0.0001        |
| Circulatory (excluding cerebrovascular) disorders                                      | 48 (1.0)                      | 231 (2.5)                             | <0.0001        |
| Infectious disorders                                                                   | 57 (1.1)                      | 141 (1.5)                             | 0.06961        |
| Respiratory, digestive, and skin disorders                                             | 123 (2.5)                     | 399 (4.3)                             | <0.0001        |
| Musculoskeletal and connective tissue disorders                                        | 503 (10.2)                    | 1,419 (15.4)                          | <0.0001        |
| Abnormal clinical and laboratory findings, NOS                                         | 455 (9.2)                     | 1,206 (13.1)                          | <0.0001        |
| Symptoms and signs involving the nervous and musculoskeletal systems                   | 176 (3.6)                     | 615 (6.7)                             | <0.0001        |
| Symptoms and signs involving cognition, perception, emotional state and behavior       | 241 (4.9)                     | 944 (10.2)                            | <0.0001        |

Data are reported as N (%), unless otherwise noted.

Abbreviations: TN, teleneurology; NOS, not otherwise specified.

"Visit diagnosis" reflects presence of one or more pre-COVID visits with this primary visit diagnosis.

**Supplemental Table 3. Pre-COVID Visit Diagnoses, Stratified by Loss to Follow-Up during the COVID Period**

| <b>Visit Diagnosis</b>                                                                 | <b>Lost to follow-up<br/>(N = 4,997)</b> | <b>Not lost to follow-up<br/>(N= 9,173)</b> | <b>p-value</b> |
|----------------------------------------------------------------------------------------|------------------------------------------|---------------------------------------------|----------------|
| Neoplasms                                                                              | 91 (1.8)                                 | 177 (1.9)                                   | 0.6506         |
| Endocrine, nutritional and metabolic diseases                                          | 129 (2.6)                                | 216 (2.3)                                   | 0.4026         |
| Dementia and delirium                                                                  | 194 (3.9)                                | 368 (4.0)                                   | 0.7060         |
| Mental (excluding neurodevelopmental) disorders                                        | 185 (3.7)                                | 414 (4.5)                                   | 0.0219         |
| Neurodevelopmental, behavioral and emotional disorders with childhood/adolescent onset | 204 (4.1)                                | 221 (2.4)                                   | <0.0001        |
| Systemic atrophies of the central nervous system                                       | 46 (0.9)                                 | 74 (0.8)                                    | 0.4798         |
| Extrapyramidal and movement disorders                                                  | 506 (10.1)                               | 1,819 (19.8)                                | <0.0001        |
| Demyelinating nervous system disorders                                                 | 300 (6.0)                                | 1,460 (15.9)                                | <0.0001        |
| Epilepsy                                                                               | 723 (14.5)                               | 1,213 (13.2)                                | 0.0392         |
| Migraine and headache disorders                                                        | 858 (17.2)                               | 1,800 (19.6)                                | 0.0004         |
| Cerebrovascular disorders                                                              | 438 (8.8)                                | 608 (6.6)                                   | <0.0001        |
| Sleep and other neurological disorders                                                 | 280 (5.6)                                | 415 (4.5)                                   | 0.0045         |
| Neuromuscular disorders                                                                | 661 (13.2)                               | 847 (9.2)                                   | <0.0001        |
| Eye, ear, and adnexal disorders                                                        | 195 (3.9)                                | 211 (2.3)                                   | <0.0001        |
| Circulatory (excluding cerebrovascular) disorders                                      | 102 (2.0)                                | 177 (1.9)                                   | 0.6476         |
| Infectious disorders                                                                   | 72 (1.4)                                 | 126 (1.4)                                   | 0.7445         |
| Respiratory, digestive, and skin disorders                                             | 140 (2.8)                                | 382 (4.2)                                   | <0.0001        |
| Musculoskeletal and connective tissue disorders                                        | 674 (13.5)                               | 1,248 (13.6)                                | 0.8458         |
| Abnormal clinical and laboratory findings, NOS                                         | 616 (12.3)                               | 1,045 (11.4)                                | 0.0982         |
| Symptoms and signs involving the nervous and musculoskeletal systems                   | 340 (6.8)                                | 451 (4.9)                                   | <0.0001        |
| Symptoms and signs involving cognition, perception, emotional state and behavior       | 559 (11.2)                               | 626 (6.8)                                   | <0.0001        |

Data are reported as N (%), unless otherwise noted.

Abbreviations: NOS, not elsewhere classified.

“Visit diagnosis” reflects presence of one or more pre-COVID visits with this primary visit diagnosis.

**Supplemental Table 4. Patient Characteristics, Stratified by Telephone Visit Utilization during the COVID Period**

| <b>Characteristic</b>                         | <b>Had a telephone visit<br/>(N = 2,093)</b> | <b>Did not have a telephone<br/>visit<br/>(N = 12,077)</b> | <b>p-value</b> |
|-----------------------------------------------|----------------------------------------------|------------------------------------------------------------|----------------|
| Age, median (IQR), years                      | 64 (48 – 75)                                 | 58 (38 – 71)                                               | <0.001         |
| Female sex                                    | 1,301 (62.1)                                 | 7,261 (60.1)                                               | 0.0785         |
| Race*                                         |                                              |                                                            | <0.0001        |
| Native American                               | 8 (0.4)                                      | 17 (0.1)                                                   |                |
| Asian                                         | 65 (3.1)                                     | 498 (4.1)                                                  |                |
| Black or African American                     | 362 (17.3)                                   | 1,882 (15.6)                                               |                |
| Pacific Islander                              | 8 (0.4)                                      | 63 (0.5)                                                   |                |
| Not reported                                  | 551 (26.3)                                   | 2,823 (23.4)                                               |                |
| White                                         | 1,099 (52.5)                                 | 6,794 (56.3)                                               |                |
| Preferred language                            |                                              |                                                            | <0.0001        |
| English                                       | 1,898 (90.6)                                 | 11,182 (92.6)                                              |                |
| Non-English                                   | 190 (9.0)                                    | 816 (6.7)                                                  |                |
| Unknown                                       | 5 (0.2)                                      | 79 (0.6)                                                   |                |
| Insurance coverage                            |                                              |                                                            | <0.0001        |
| Commercial                                    | 555 (26.5)                                   | 5,351 (44.3)                                               |                |
| Medicaid                                      | 362 (17.3)                                   | 1,493 (12.4)                                               |                |
| Medicare                                      | 1,033 (49.3)                                 | 4,400 (36.4)                                               |                |
| Other                                         | 44 (2.1)                                     | 312 (2.6)                                                  |                |
| Unknown                                       | 99 (4.7)                                     | 521 (4.3)                                                  |                |
| ZIP code AGI per household, median,<br>\$US   | 79,292 (53,526 – 173,596)                    | 88,431 (54,845 – 180,347)                                  | 0.049          |
| Charlson-Deyo comorbidity index               |                                              |                                                            | <0.0001        |
| 0                                             | 1,232 (58.9)                                 | 7,889 (65.3)                                               |                |
| 1                                             | 479 (22.9)                                   | 2,355 (19.5)                                               |                |
| 2                                             | 188 (9.0)                                    | 903 (7.5)                                                  |                |
| ≥ 3                                           | 194 (9.3)                                    | 930 (7.7)                                                  |                |
| Health utilization during COVID19<br>period** |                                              |                                                            |                |
| ≥ 1 TN visit                                  | 707 (33.8)                                   | 4,237 (35.1)                                               | 0.258          |
| ≥ 1 office visit                              | 918 (43.9)                                   | 3,659 (30.3)                                               | <0.001         |
| ≥ 1 ED visit                                  | 298 (14.2)                                   | 1,016 (8.4)                                                | <0.001         |
| ≥ 1 hospital admission                        | 210 (10.0)                                   | 675 (5.6)                                                  | <0.001         |
| Lost to follow-up                             | 0 (0.0)                                      | 4,997 (35.3)                                               | <0.001         |

Data are reported as N (%), unless otherwise noted.

\*Race variable is imputed as described in Methods. \*\*Percentages may not add to 100% since categories are not mutually exclusive.

Abbreviations: COVID19, coronavirus disease 2019; IQR, interquartile range; AGI, annual gross income.

**Supplemental Table 5. Patient Characteristics, Stratified by Office Visit Utilization during the COVID Period**

| <b>Characteristic</b>                         | <b>Had an office visit<br/>(N = 4,577)</b> | <b>Did not have an office visit<br/>(N = 9,593)</b> | <b>p-<br/>value</b> |
|-----------------------------------------------|--------------------------------------------|-----------------------------------------------------|---------------------|
| Age, median (IQR), years                      | 62.0 (48.0 – 74.0)                         | 56.0 (36.0 – 71.0)                                  | <0.001              |
| Female sex                                    | 2,827 (61.8)                               | 5,735 (59.8)                                        | 0.0240              |
| Race*                                         |                                            |                                                     | <0.000<br>1         |
| Native American                               | 9 (0.2)                                    | 16 (0.2)                                            |                     |
| Asian                                         | 177 (3.9)                                  | 386 (4.0)                                           |                     |
| Black or African American                     | 718 (15.7)                                 | 1,526 (15.9)                                        |                     |
| Pacific Islander                              | 29 (0.6)                                   | 41 (0.4)                                            |                     |
| Not reported                                  | 1,102 (24.1)                               | 2,271 (23.7)                                        |                     |
| White                                         | 2,541 (55.5)                               | 5,352 (55.8)                                        |                     |
| Preferred language                            |                                            |                                                     | 0.0028              |
| English                                       | 4,180 (91.3)                               | 8,900 (92.8)                                        |                     |
| Non-English                                   | 373 (8.1)                                  | 633 (6.6)                                           |                     |
| Unknown                                       | 24 (0.5)                                   | 60 (0.6)                                            |                     |
| Insurance coverage                            |                                            |                                                     | <0.000<br>1         |
| Commercial                                    | 1,547 (33.8)                               | 4,359 (45.4)                                        |                     |
| Medicaid                                      | 640 (14.0)                                 | 1,215 (12.7)                                        |                     |
| Medicare                                      | 2,107 (46.0)                               | 3,326 (34.7)                                        |                     |
| Other                                         | 104 (2.3)                                  | 252 (2.6)                                           |                     |
| Unknown                                       | 179 (3.9)                                  | 441 (4.6)                                           |                     |
| ZIP code AGI per household, median,<br>\$US   | 87,535 (53,526 –<br>179,965)               | 86,910 (55,587 – 180,347)                           | 0.693               |
| Charlson-Deyo comorbidity index               |                                            |                                                     | <0.000<br>1         |
| 0                                             | 2,792 (61.0)                               | 6,329 (66.0)                                        |                     |
| 1                                             | 1,000 (21.8)                               | 1,834 (19.1)                                        |                     |
| 2                                             | 392 (8.6)                                  | 699 (7.3)                                           |                     |
| ≥ 3                                           | 393 (8.6)                                  | 731 (7.6)                                           |                     |
| Health utilization during COVID19<br>period** |                                            |                                                     |                     |
| ≥ 1 TN visit                                  | 1,645 (35.9)                               | 3,299 (34.4)                                        | 0.073               |
| ≥ 1 telephone visit                           | 918 (20.1)                                 | 1,175 (12.2)                                        | <0.001              |
| ≥ 1 ED visit                                  | 555 (12.1)                                 | 759 (7.9)                                           | <0.001              |
| ≥ 1 hospital admission                        | 366 ( 8.0)                                 | 519 (5.4)                                           | <0.001              |
| Lost to follow-up                             | 0 (0.0)                                    | 4,977 (52.1)                                        | <0.001              |

Data are reported as N (%), unless otherwise noted.

\*Race variable is imputed as described in Methods. \*\*Percentages may not add to 100% since categories are not mutually exclusive.

Abbreviations: COVID19, coronavirus disease 2019; IQR, interquartile range; AGI, annual gross income.

**Supplemental Table 6. Patient Characteristics Stratified by Utilization of ED Visits during the COVID Period**

| <b>Characteristic</b>                      | <b>Presented to ED<br/>(N = 1,314)</b> | <b>Did not present to ED<br/>(N = 12,856)</b> | <b>p-value</b> |
|--------------------------------------------|----------------------------------------|-----------------------------------------------|----------------|
| Age, median (IQR), years                   | 64.0 (48.0 – 75.0)                     | 58.0 (38.0 – 72.0)                            | <0.001         |
| Female sex                                 | 832 (63.3)                             | 7,730 (60.1)                                  | 0.0243         |
| Race*                                      |                                        |                                               | <0.0001        |
| Native American                            | 2 (0.2)                                | 23 (0.2)                                      |                |
| Asian                                      | 45 (3.4)                               | 519 (4.0)                                     |                |
| Black or African American                  | 363 (27.6)                             | 1,881 (14.6)                                  |                |
| Pacific Islander                           | 5 (0.4)                                | 65 (0.5)                                      |                |
| Not reported                               | 457 (34.7)                             | 2,917 (22.7)                                  |                |
| White                                      | 443 (33.7)                             | 7,451 (58.0)                                  |                |
| Preferred language                         |                                        |                                               | <0.0001        |
| English                                    | 1,133 (86.2)                           | 11,947 (92.9)                                 |                |
| Non-English                                | 179 (13.6)                             | 827 (6.4)                                     |                |
| Unknown                                    | 2 (0.1)                                | 82 (0.6)                                      |                |
| Insurance coverage                         |                                        |                                               | <0.0001        |
| Commercial                                 | 235 (17.9)                             | 5,671 (44.1)                                  |                |
| Medicaid                                   | 300 (22.8)                             | 1,555 (12.1)                                  |                |
| Medicare                                   | 670 (51.0)                             | 4,763 (37.0)                                  |                |
| Other                                      | 32 (2.4)                               | 324 (2.5)                                     |                |
| Unknown                                    | 77 (5.9)                               | 543 (4.2)                                     |                |
| ZIP code AGI per household, median, \$US   | 68,403 (51,246 - 173,596)              | 88,813 (55,881 – 180,347)                     | <0.001         |
| Charlson-Deyo comorbidity index            |                                        |                                               | <0.0001        |
| 0                                          | 510 (38.8)                             | 8,611 (67.0)                                  |                |
| 1                                          | 400 (30.4)                             | 2,434 (18.9)                                  |                |
| 2                                          | 200 (15.2)                             | 891 (6.9)                                     |                |
| ≥ 3                                        | 204 (15.5)                             | 920 (7.1)                                     |                |
| Health utilization during COVID19 period** |                                        |                                               |                |
| ≥ 1 TN visit                               | 351 (26.7)                             | 4,593 (35.7)                                  | <0.001         |
| ≥ 1 telephone visit                        | 298 (22.7)                             | 1,795 (14.0)                                  | <0.001         |
| ≥ 1 office visit                           | 555 (42.2)                             | 4,022 (31.3)                                  | <0.001         |
| ≥ 1 hospital admission                     | 623 (47.4)                             | 262 (2.0)                                     | <0.001         |
| Lost to follow-up                          | 0 (0.0)                                | 4,997 (38.9)                                  | <0.001         |

Data are reported as N (%), unless otherwise noted.

\*Race variable is imputed as described in Methods. \*\*Percentages may not add to 100% since categories are not mutually exclusive.

Abbreviations: ED, emergency department; COVID19, coronavirus disease 2019; IQR, interquartile range; AGI, annual gross income.

**Supplemental Table 7. Patient Characteristics, Stratified by Utilization of Hospital Admissions during the COVID Period**

| <b>Characteristic</b>                      | <b>Hospitalized<br/>(N = 885)</b> | <b>Not hospitalized<br/>(N = 13,285)</b> | <b>p-value</b> |
|--------------------------------------------|-----------------------------------|------------------------------------------|----------------|
| Age, median (IQR), years                   | 66.0 (50.0 – 77.0)                | 58.0 (39.0 – 72.0)                       | <0.001         |
| Female sex                                 | 503 (56.8)                        | 8,059 (60.7)                             | 0.027          |
| Race*                                      |                                   |                                          | <0.0001        |
| Native American                            | 2 (0.2)                           | 23 (0.2)                                 |                |
| Asian                                      | 32 (3.6)                          | 531 (4.0)                                |                |
| Black or African American                  | 214 (24.1)                        | 2031 (15.3)                              |                |
| Pacific Islander                           | 4 (0.5)                           | 66 (0.5)                                 |                |
| Not reported                               | 265 (30.0)                        | 3,108 (23.4)                             |                |
| White                                      | 368 (41.6)                        | 7,526 (56.7)                             |                |
| Preferred language                         |                                   |                                          |                |
| English                                    | 765 (86.4)                        | 12315 (92.7)                             | <0.001         |
| Non-English                                | 119 (13.4)                        | 887 (6.7)                                |                |
| Unknown                                    | 1 (0.1)                           | 83 (0.6)                                 |                |
| Insurance coverage                         |                                   |                                          |                |
| Commercial                                 | 181 (20.5)                        | 5725 (43.1)                              | <0.001         |
| Medicaid                                   | 152 (17.2)                        | 1703 (12.8)                              |                |
| Medicare                                   | 489 (55.3)                        | 4944 (37.2)                              |                |
| Other                                      | 9 (1.0)                           | 347 (2.6)                                |                |
| Unknown                                    | 54 (6.1)                          | 566 (4.3)                                |                |
| ZIP code AGI per household, median, \$US   | 71,181 (53,526 – 173,596)         | 88,124 (54,665 – 180,347)                | 0.003          |
| Charlson-Deyo comorbidity index            |                                   |                                          |                |
| 0                                          | 317 (35.8)                        | 8,804 (66.3)                             | <0.001         |
| 1                                          | 257 (29.0)                        | 2,577 (19.4)                             |                |
| 2                                          | 134 (15.1)                        | 957 (7.2)                                |                |
| ≥ 3                                        | 177 (20.0)                        | 947 (7.1)                                |                |
| Health utilization during COVID19 period** |                                   |                                          |                |
| ≥ 1 TN visit                               | 304 (34.4)                        | 4,640 (34.9)                             | 0.755          |
| ≥ 1 telephone visit                        | 210 (23.7)                        | 1,883 (14.2)                             | <0.001         |
| ≥ 1 office visit                           | 366 (41.4)                        | 4,211 (31.7)                             | <0.001         |
| ≥ ED visit                                 | 623 (70.4)                        | 691 ( 5.2)                               | <0.001         |
| Lost to follow-up                          | 0 ( 0.0)                          | 4,997 (37.6)                             | <0.001         |

Data are reported as N (%), unless otherwise noted.

\*Race variable is imputed as described in Methods. \*\*Percentages may not add to 100% since categories are not mutually exclusive.

Abbreviations: COVID19, coronavirus disease 2019; IQR, interquartile range; AGI, annual gross income.
